1 **Very low depth whole genome sequencing in complex trait association studies**

2

3 Arthur Gilly<sup>1</sup>, Lorraine Southam<sup>1,2</sup>, Daniel Suveges<sup>1</sup>, Karoline Kuchenbaecker<sup>1</sup>, Rachel Moore<sup>1</sup>,  
4 Giorgio E.M. Melloni<sup>1,3</sup>, Konstantinos Hatzikotoulas<sup>1</sup>, Aliko-Eleni Farmaki<sup>4</sup>, Graham Ritchie<sup>1,5</sup>,  
5 Jeremy Schwartzentruber<sup>1</sup>, Petr Danecek<sup>1</sup>, Britt Kilian<sup>1</sup>, Martin O. Pollard<sup>1</sup>, Xiangyu Ge<sup>1</sup>,  
6 Emmanouil Tsafantakis<sup>6</sup>, George Dedoussis<sup>4</sup>, Eleftheria Zeggini<sup>1\*</sup>

7

8 <sup>1</sup> Department of Human Genetics, Wellcome Sanger Institute, Wellcome Genome Campus, Hinxton, Cambridge CB10 1HH,  
9 UK

10 <sup>2</sup> Wellcome Centre for Human Genetics, University of Oxford, Oxford OX3 7BN, UK

11 <sup>3</sup> Center for Genomic Science of IIT@SEMM, Fondazione Istituto Italiano di Tecnologia (IIT), Via Adamello 16, 20139, Milan,  
12 Italy

13 <sup>4</sup> Department of Nutrition and Dietetics, School of Health Science and Education, Harokopio University of Athens, Greece

14 <sup>5</sup> European Bioinformatics Institute, Wellcome Genome Campus, Hinxton CB10 1SH, UK.

15 <sup>6</sup> Anogia Medical Centre, Anogia, Greece

16

17 \* to whom correspondence should be addressed

18

19

20

21

## 22 **Abstract**

23 Motivation: Very low depth sequencing has been proposed as a cost-effective approach to  
24 capture low-frequency and rare variation in complex trait association studies. However, a full  
25 characterisation of the genotype quality and association power for very low depth sequencing  
26 designs is still lacking.

27 Results: We perform cohort-wide whole genome sequencing (WGS) at low depth in 1,239  
28 individuals (990 at 1x depth and 249 at 4x depth) from an isolated population, and establish  
29 a robust pipeline for calling and imputing very low depth WGS genotypes from standard  
30 bioinformatics tools. Using genotyping chip, whole-exome sequencing (WES, 75x depth) and  
31 high-depth (22x) WGS data in the same samples, we examine in detail the sensitivity of this  
32 approach, and show that imputed 1x WGS recapitulates 95.2% of variants found by imputed  
33 GWAS with an average minor allele concordance of 97% for common and low-frequency  
34 variants. In our study, 1x further allowed the discovery of 140,844 true low-frequency variants  
35 with 73% genotype concordance when compared to high-depth WGS data. Finally, using  
36 association results for 57 quantitative traits, we show that very low depth WGS is an efficient  
37 alternative to imputed GWAS chip designs, allowing the discovery of up to twice as many true  
38 association signals than the classical imputed GWAS design.

39 Supplementary Data: Supplementary Data are appended to this manuscript.

40

41

## 42 **Introduction**

43 The contribution of low-frequency and rare variants to the allelic architecture of complex  
44 traits remains largely uncharted. Power to detect association is central to genetic studies  
45 examining sequence variants across the full allele frequency spectrum. Whole genome  
46 sequencing (WGS)-based association studies hold the promise of probing a larger proportion  
47 of sequence variation compared to imputed genome-wide genotyping arrays. However,  
48 although large-scale high-depth WGS efforts are now underway (Brody, et al., 2017),  
49 comparatively high costs do not yet allow for the generalised transposition of the GWAS  
50 paradigm to high-depth sequencing. As sample size and haplotype diversity are more  
51 important than sequencing depth in determining power for association studies (Alex Buerkle  
52 and Gompert, 2013; Le and Durbin, 2011), low-depth WGS has emerged as an alternative,  
53 cost-efficient approach to capture low-frequency variation in large studies. Improvements in  
54 calling algorithms have enabled robust genotyping using WGS at low depth (4x-8x), leading  
55 to the creation of large haplotype reference panels (1000 Genomes Project Consortium, et  
56 al., 2015; McCarthy, et al., 2016), and to several low-depth WGS-based association studies  
57 (Astle, et al., 2016; Tachmazidou, et al., 2017; UK10K Consortium, et al., 2015). Very low depth  
58 (<2x) sequencing has been proposed as an efficient way to further improve the cost efficiency  
59 of sequencing-based association studies. Simulations have shown that in WES designs,  
60 extremely low sequencing depths (0.1-0.5x) are effective in capturing single-nucleotide  
61 variants (SNVs) in the common (MAF>5%) and low-frequency (MAF 1-5%) categories  
62 compared to imputed GWAS arrays (Pasaniuc, et al., 2012). The CONVERGE consortium  
63 demonstrated the feasibility of such approaches through the first successful case-control  
64 study of major depressive disorder in 4,509 cases and 5,337 controls (Converge Consortium,  
65 2015), and we previously showed that 1x WGS allowed the discovery of replicating burdens

66 of low-frequency and rare variants (Gilly, et al., 2016). However, a systematic examination of  
67 genotyping quality from 1x WGS and its implications for power in association studies is  
68 lacking, posing the question of the generalisability of such results in the wider context of next-  
69 generation association studies. Here, we perform very low depth (1x), cohort-wide WGS in an  
70 isolated population from Greece, show that imputation tools commonly used with chip data  
71 perform well using 1x WGS, and establish a detailed quality profile of called variants. We then  
72 demonstrate the advantages of 1x WGS compared to the more traditional imputed GWAS  
73 design both in terms of genotype accuracy and power to detect association signals.

74

## 75 **Results**

76 As part of the Hellenic Isolated Cohorts (HELIC) study, we whole genome sequenced 990  
77 individuals from the Minoan Isolates (HELIC-MANOLIS) cohort at 1x depth, on the Illumina  
78 HiSeq2000 platform. In addition, 249 samples from the MANOLIS cohort were sequenced at  
79 4x depth (Southam, et al., 2017). Imputation-based genotype refinement was performed on  
80 the cohort-wide dataset using a combined reference panel of 10,244 haplotypes from  
81 MANOLIS 4x WGS, the 1000 Genomes (1000 Genomes Project Consortium, et al., 2015) and  
82 UK10K (UK10K Consortium, et al., 2015) projects (Figure 1).

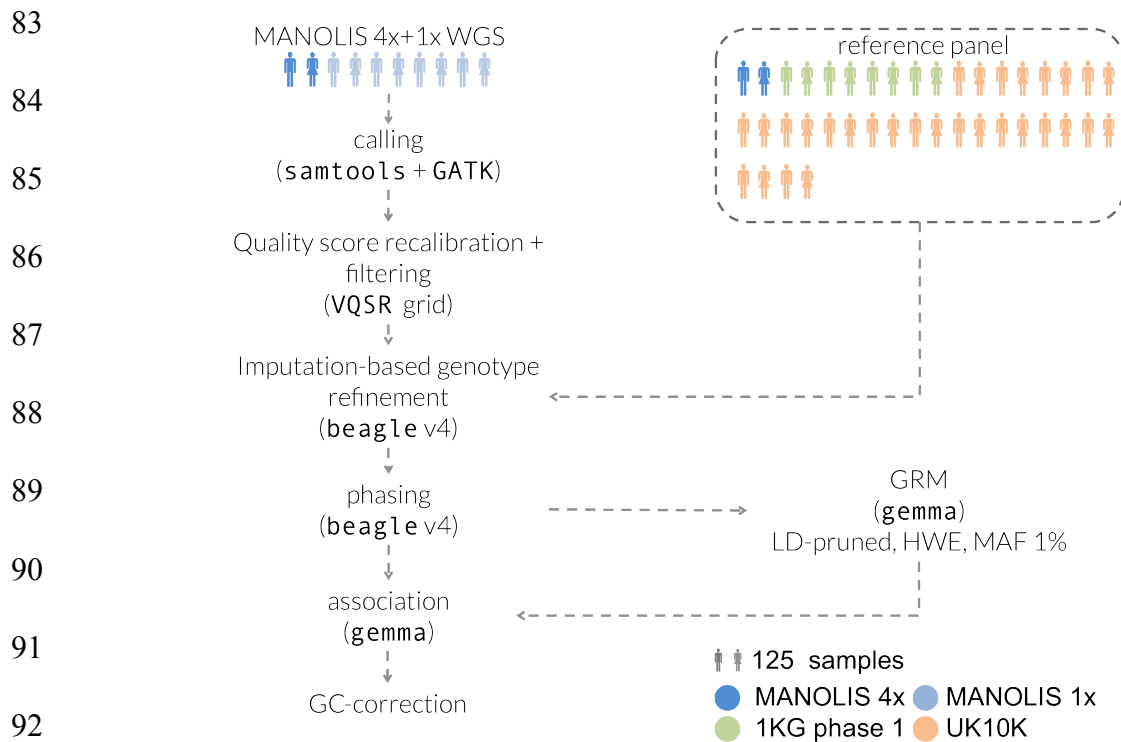

93 **Figure 1: Processing pipeline for the MANOLIS 1x data.** Tools and parameters for the genotype refinement  
94 and phasing steps were selected after benchmarking nine pipelines involving four different tools (See  
95 Methods).  
96

## 97 Variant calling pipeline

98 Prior to any imputation-based refinement, our approach allowed the capture of 80% and  
99 100% of low-frequency (MAF 1-5%) and common (MAF>5%) SNVs, respectively, when  
100 compared to variants present on the Illumina OmniExpress and HumanExome chips  
101 genotyped in the same samples. In 10 control samples with high-depth WGS data  
102 downsampled to 1x, joint calling with MANOLIS resulted in pre-imputation false positive and  
103 false negative rates of 12% and 24.6%, respectively (See Methods).

104

105 In order to improve sensitivity and genotype accuracy, we compared nine genotype  
106 refinement and imputation pipelines using tools commonly used for genotyping chip  
107 imputation, using directly typed OmniExpress and ExomeChip genotypes as a benchmark (See  
108 Methods). We used a reference panel containing haplotypes from 4,873 cosmopolitan

109 samples from the 1000 Genomes and UK10K projects, as well as the phased haplotypes from  
110 249 MANOLIS samples sequenced at 4x depth. The best-performing pipeline, described in  
111 Figure 1, captures 95% of rare, 99.7% of low-frequency and 99.9% of common variants  
112 present in chip data, with an average minor allele concordance of 97% across the allele  
113 frequency spectrum (see Methods, Figure 2a., Supplementary Figure 1). 79.7% of 1x WGS  
114 variants were found using high-depth WGS at 22x in a subset of the MANOLIS samples  
115 (n=1,225), although this positive predictive value varied across the MAF spectrum, from 8.9%  
116 for singletons to 95.1% for common variants (Figure 2b.). Genotype concordance was similar,  
117 although slightly lower, when compared to the chip variants. Due to the 22x data being  
118 aligned to a different build, we were unable to compute genome-wide false positive rates,  
119 however by comparing 1x calls with those produced by whole-exome sequencing in 5  
120 individuals from the MANOLIS cohort, we estimate a false-positive rate of 2.4% post-  
121 imputation in the coding parts of the genome (see Methods).

122

123

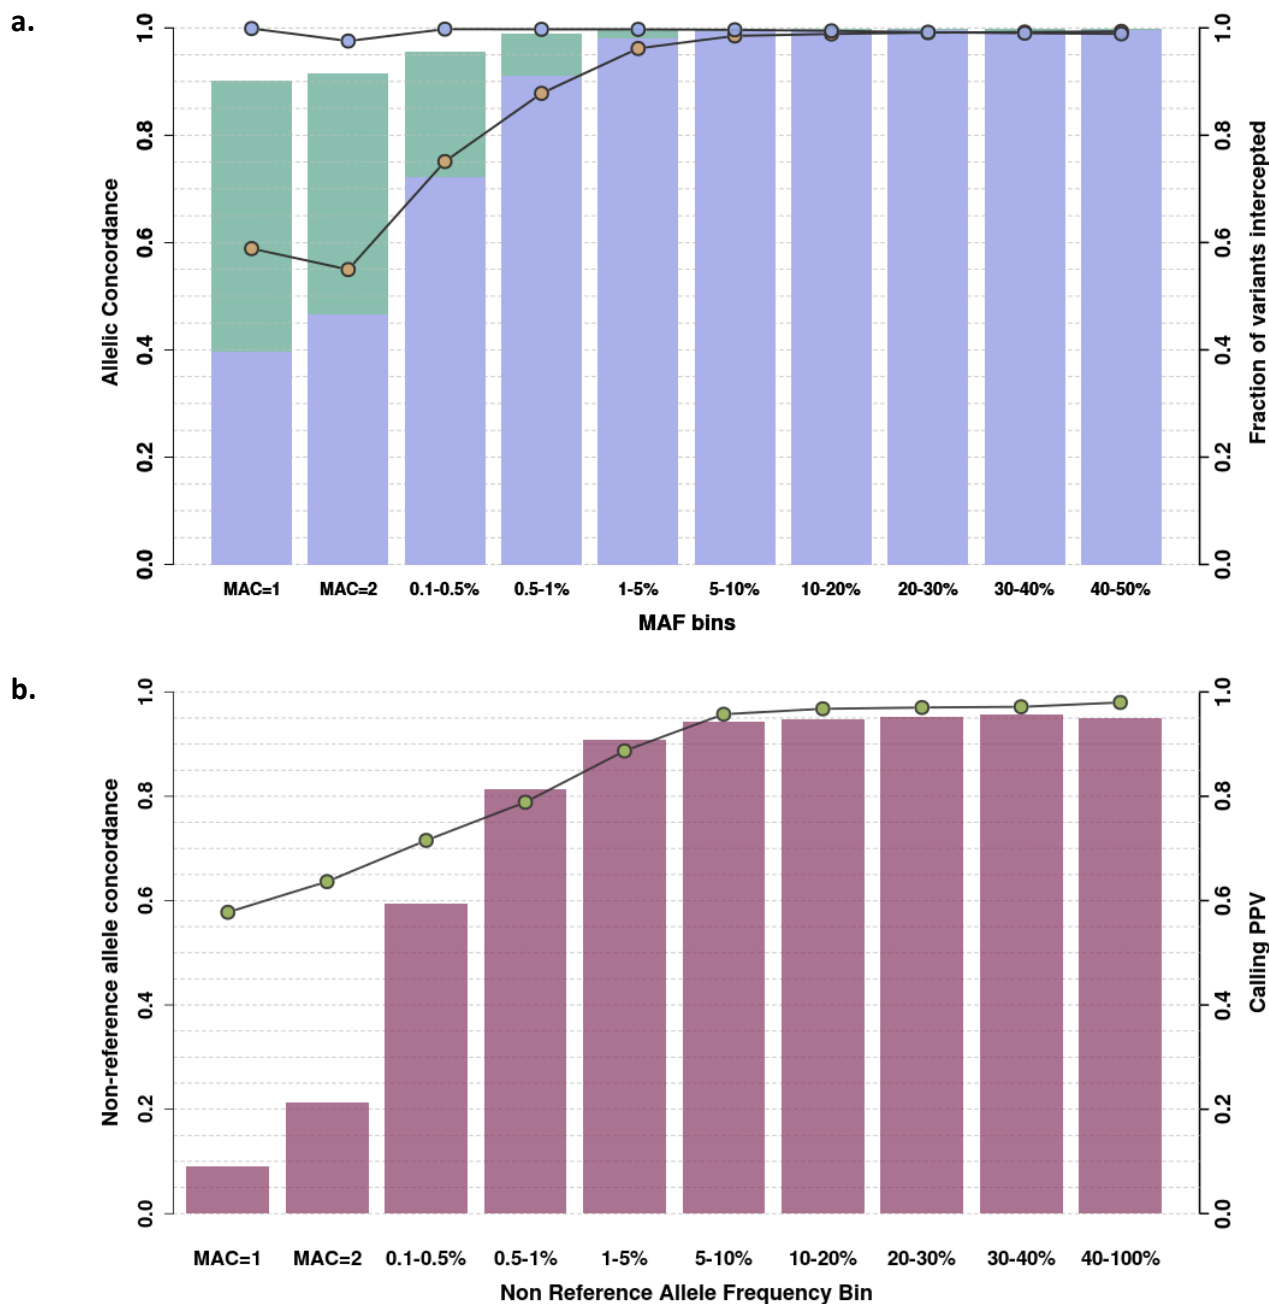

124 **Figure 2: Concordance and call rate for very low depth WGS genotypes. a.** Genotype (blue circles) and  
 125 minor allele (yellow circles) concordance is computed for 1,239 samples in MANOLIS against merged  
 126 OmniExpress and ExomeChip data. Call rate is assessed for the refined (purple) and refined plus imputed  
 127 (green) datasets. **b.** Non-reference allele concordance (green circles) and positive predictive value (PPV)  
 128 (fuchsia bars) is computed for 1,225 MANOLIS samples with both 22x WGS and low-depth calls.

129

130

131 **Comparison of variant call sets with an imputed GWAS**

132 The genotype refinement and imputation step yielded 30,483,136 non-monomorphic SNVs in  
133 1,239 MANOLIS individuals. The number of variants discovered using 1x WGS is nearly twice  
134 as high as that from array-based approaches. In a subset of 982 MANOLIS individuals with  
135 both 1x WGS, OmniExpress and ExomeChip data, we called 25,673,116 non-monomorphic  
136 SNVs using 1x WGS data, compared to 13,078,518 non-monomorphic SNVs in the same  
137 samples with chip data imputed up to the same panel (Southam, et al., 2017) without any  
138 imputation INFO score filtering. The main differences are among rare variants (MAF<1%)  
139 (Figure 3): 13,671,225 (53.2%) variants called in the refined 1x WGS are absent from the  
140 imputed GWAS, 98% of which are rare. 82% of these rare unique SNVs are singletons or  
141 doubletons, and therefore 9.5% of all variants called in the 1x WGS dataset were unique  
142 variants with MAC>2.

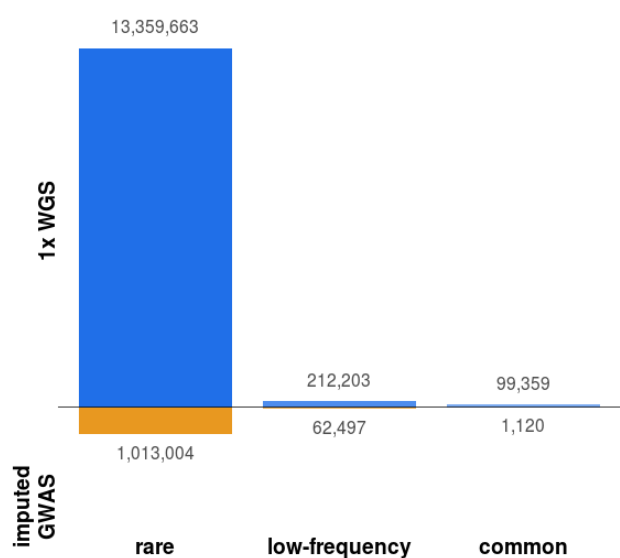

**Figure 3: Unique variants called by sequencing and imputed GWAS.** Variants unique to either dataset, arranged by MAF bin. Both datasets are unfiltered apart from monomorphics, which are excluded. MAF categories: rare (MAF<1%), low-frequency (MAF 1-5%), common (MAF>5%).

154

155 A crucial question is the proportion of true positives among these additional SNVs not found  
156 by GWAS and imputation. By comparing their positions and alleles with high-depth WGS in  
157 the same samples, we find that the PPV profile for these variants is much lower compared to  
158 when all variants are examined (Figure 4 and Figure 2.b). As expected, PPV is almost zero for  
159 additional singletons and doubletons, and just above 40% for the few additional common



160 variants. 62% of low-frequency variants unique to the 1x are true positives, which  
161 corresponds to 140,844 low-frequency variants with high genotyping quality that are missed  
162 by the imputed GWAS. Minor allele concordance is lower than for all variants, with a lower  
163 bound at 55% for rare variants and reaching 73% for novel low-frequency variants.

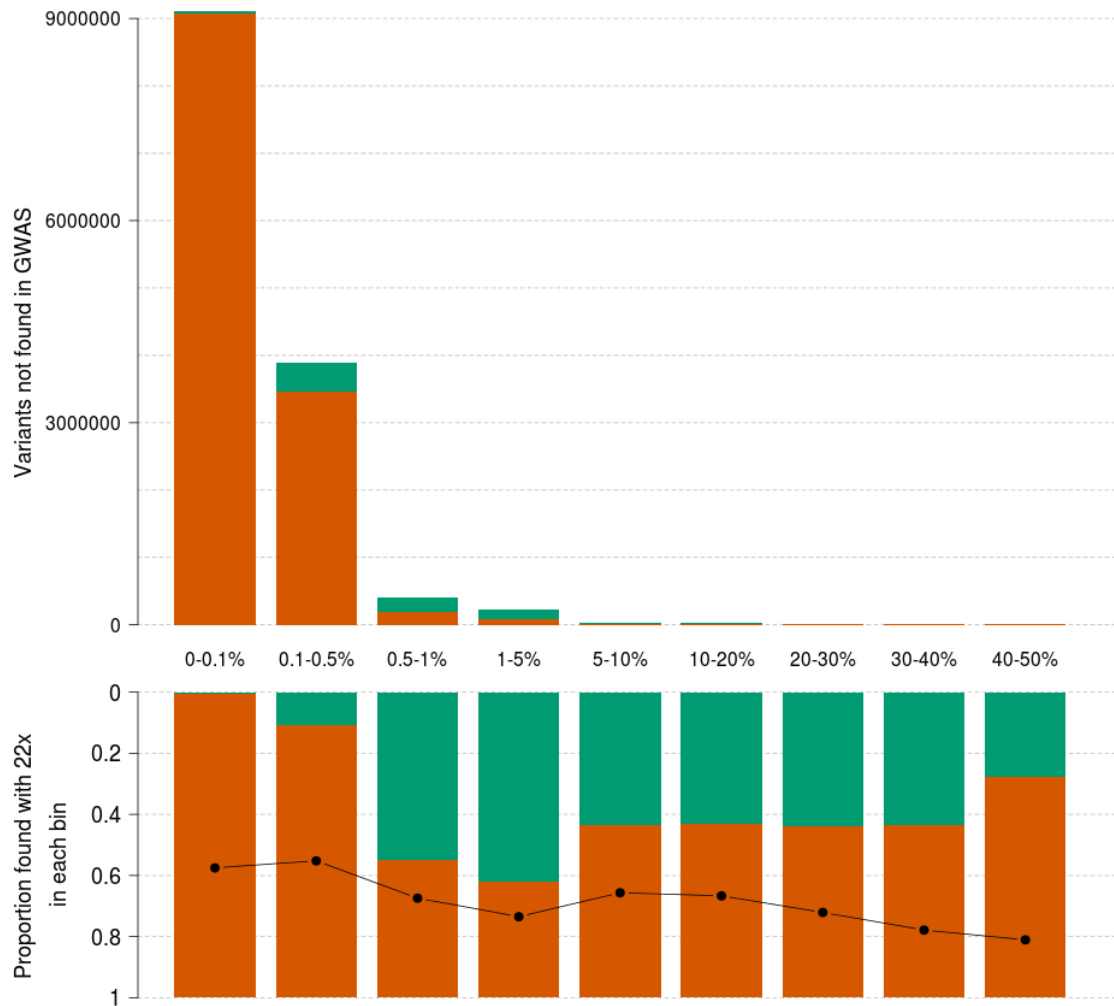

164 **Figure 4: Positive predictive value of additional variants called in 1x sequencing.** 1x variants not found in  
165 the GWAS data, arranged by MAF bin, in raw numbers (top). Green bars count variants recapitulated in the  
166 22x (true positives). The proportion of these over the total (positive predictive value) is displayed in each  
167 bin in the bottom panel. The black line indicates minor allele concordance for true positive variants. The  
168 first category (0-0.1%) contains singletons and doubletons only.

169

170

171

## 172 **Comparison of association summary statistics with imputed GWAS**

173 1x WGS calls a larger number of variants and is noisier than imputed GWAS in the same  
174 samples. To evaluate how this difference affects association study power, we performed  
175 genome-wide association of 57 quantitative traits in 1,225 overlapping samples with both  
176 imputed OmniExome and 1x WGS using both sources of genotype data. We then compared  
177 independent suggestively associated signals at  $p < 5 \times 10^{-7}$  (Supplementary Table 1). These  
178 signals were then cross-referenced with a larger ( $n=1,457$ ) study based on 22x WGS on the  
179 same traits in the same cohort (Gilly, et al., 2018). We only considered signals to be true if  
180 they displayed evidence for association with at most a two order of magnitude attenuation  
181 compared to our suggestive significance threshold ( $P < 5 \times 10^{-5}$ ). According to this metric, 52 of  
182 182 independent signals (28.5%) were true in the imputed GWAS, in contrast to 108 of 462  
183 (23.4%) in the 1x study (Figure 5). With an equal sample size and identically transformed  
184 traits, 1x therefore allowed to discover twice as many independent GWAS signals with almost  
185 identical truth sensitivity. Seven rare and three suggestive low-frequency variant associations  
186 in the 1x WGS data (9.2% of all signals) were driven by a variant not present and without a  
187 tagging SNP at  $r^2 > 0.8$  in the imputed GWAS, whereas the converse is true for only two rare  
188 variants in the imputed GWAS. Among variants called or tagged in the imputed GWAS, 4 rare,  
189 11 low-frequency and 5 common SNV associations detected in the 1x (19% of total) are not  
190 seen associated below that threshold in the imputed GWAS. As expected, there are  
191 significantly fewer (3.8%,  $P=0.01$ , one-sided chi-square proportion test) true associations in  
192 the imputed GWAS not recapitulated by the 1x study.

193

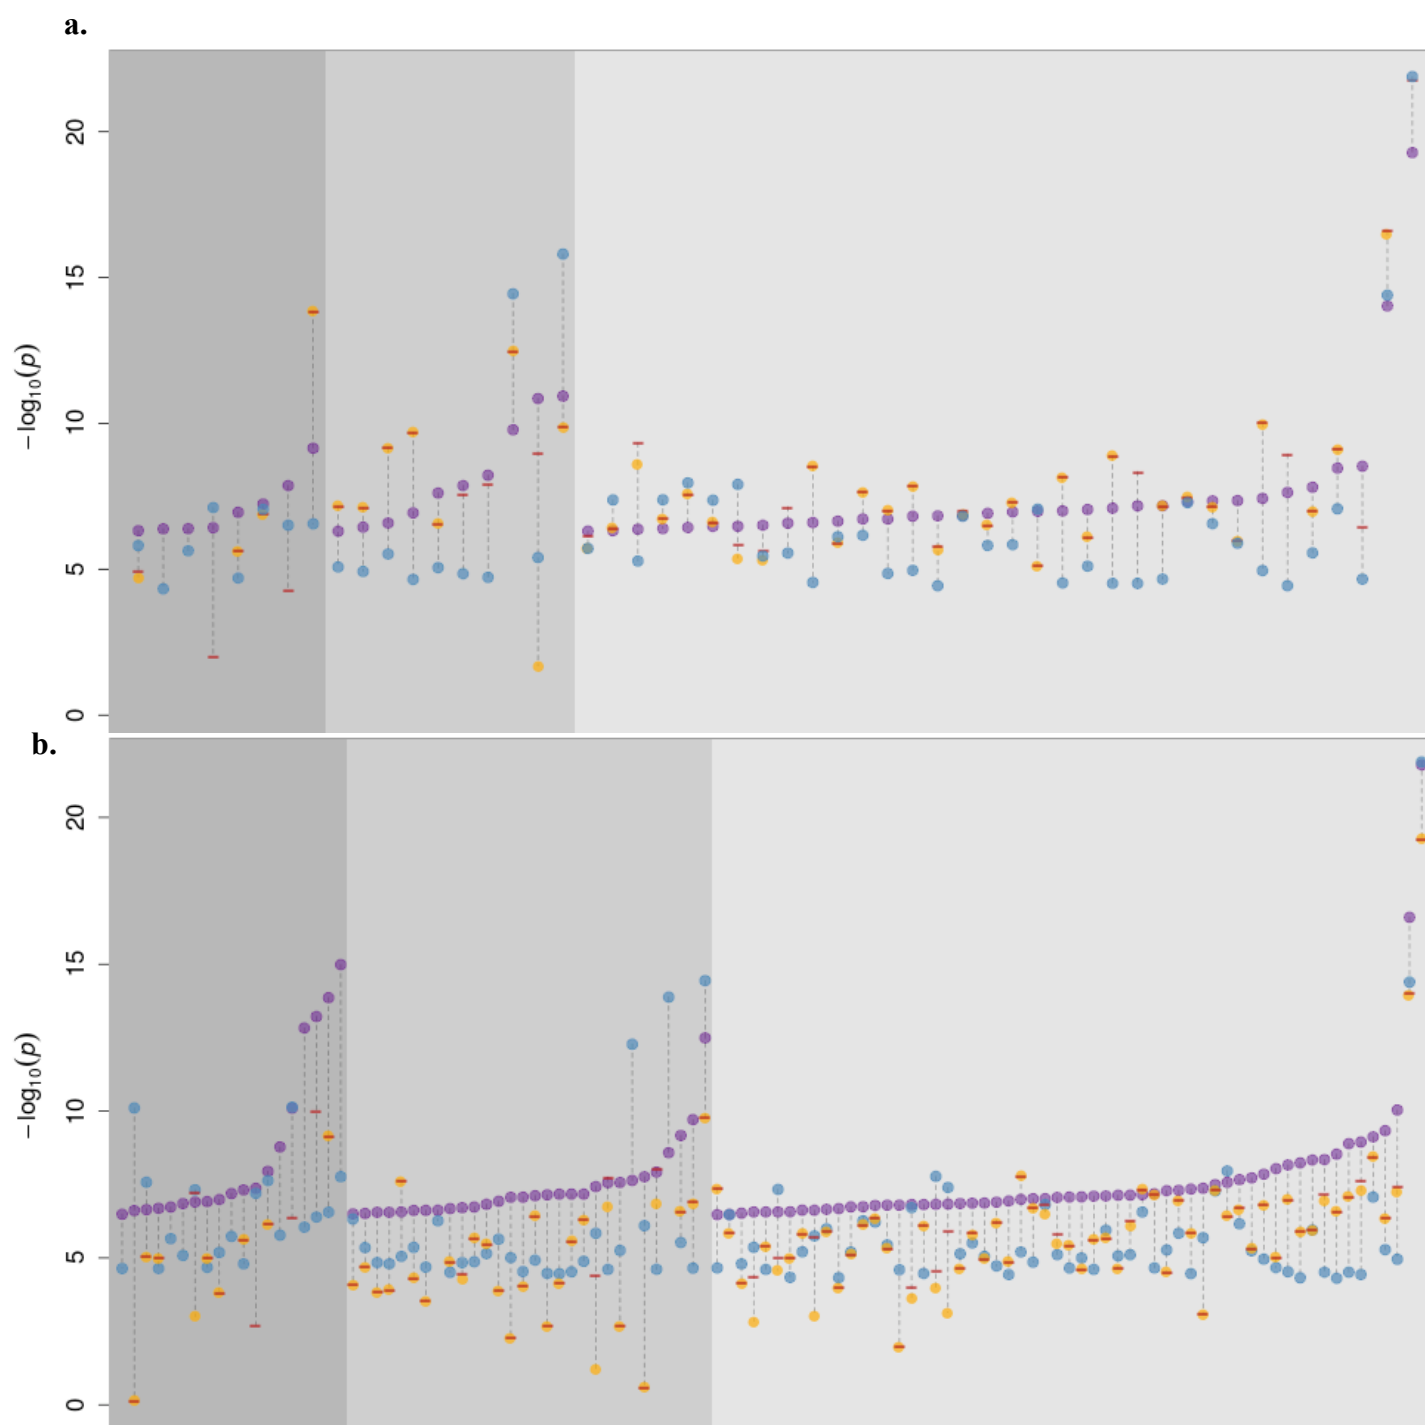

194 **Figure 5: Association signals in the 1x WGS and imputed GWAS at  $p < 5 \times 10^{-7}$  for 57 quantitative traits**  
195 **in 1,225 samples.** Purple dots represent significant results in the 1x WGS (a.) and imputed GWAS (b.)  
196 analysis. Orange dots, if present, denote the p-value of the same SNP in the other study. Blue dots  
197 represent the association p-value in a larger ( $n=1,457$ ) association study based on 22x WGS. Signals with a  
198 22x WGS p-value above  $5 \times 10^{-5}$  were considered as false positives in both studies and excluded from the  
199 plot. Red dashes indicate the minimum p-value among all tagging SNVs in the other dataset ( $r^2 > 0.8$ ).  
200 Absence of an orange dot and/or a red dash means that the variant was not present and/or no tagging  
201 variant could be found for that signal in the other study.  
202

203

204 **Discussion**

205 In this work, we empirically demonstrate the relative merits of very low depth WGS both in  
206 terms of variant discovery and association study power for complex quantitative traits  
207 compared to GWAS approaches. However, the advantages of 1x WGS have to be weighed  
208 against compute and financial cost considerations. As of summer 2018, 1x WGS on the HiSeq  
209 4000 platform was approximately half of the cost of a dense GWAS array (e.g. Illumina  
210 Infinium Omni 2.5Exome-8 array), the same cost as a sparser chip such as the Illumina  
211 HumanCoreExome array, and half of the cost of WES at 50x depth. By comparison, 30x WGS  
212 was 23 or 15 times more costly depending on the sequencing platform (Illumina HiSeq 4000  
213 or HiSeqX, respectively). The number of variants called by 1x WGS is lower than high-depth  
214 WGS, but is in the same order of magnitude, suggesting comparable disk storage  
215 requirements for variant calls. However, storage of the reads required an average 650Mb per  
216 sample for CRAMs, and 1.3Gb per sample for BAMs.

217  
218 Genome-wide refinement and imputation of very low depth WGS generates close to 50 times  
219 more variants than a GWAS chip. The complexity of the imputation and phasing algorithms  
220 used in this study is linear in the number of markers, linear in the number of target samples  
221 and quadratic in the number of reference samples (Browning and Browning, 2016), which  
222 results in a 50-fold increase in total processing time compared to an imputed GWAS study of  
223 equal sample size. In MANOLIS the genome was divided in 13,276 chunks containing equal  
224 number of SNVs, which took an average of 31 hours each to refine and impute. The total  
225 processing time was 47 core-years (see Methods and Supplementary Figure 2). This  
226 parallelisation allowed processing the 1,239 MANOLIS samples in under a month, and as  
227 imputation software continue to grow more efficient (Bycroft, et al., 2017), future pipelines  
228 should greatly simplify postprocessing of very low depth sequencing data.

229

230 As a proof of principle, we used imputed GWAS, 1x and 22x WGS in overlapping samples from  
231 an isolated population to assess how genotyping quality influences power in association  
232 studies. As we only wanted to study the implications of varying genotype qualities afforded  
233 by different designs on association p-values in a discovery setting, we considered only  
234 suggestively associated signals and did not seek replication in a larger cohorts for the  
235 discovered signals. In our study of 57 quantitative traits, we show that an 1x-based design  
236 allows the discovery of twice as many of the signals suggestively associated in the more  
237 accurate 22x WGS study, compared to the imputed GWAS design. Almost 10% of the  
238 suggestive signals arising in the 1x data are not discoverable in the imputed GWAS, but the  
239 great majority (96%) of imputed GWAS signals is found using the 1x.

240

241 The 1x-based study seems to discover more signals than the imputed GWAS across the MAF  
242 spectrum, and this remains true whether or not the signals are filtered for suggestive  
243 association p-value in the more accurate 22x based study (Supplementary Table 2). At first  
244 glance this suggests 1x WGS has better detection power than the imputed GWAS across the  
245 MAF spectrum, however it is unlikely that this is true for common variants, which are reliably  
246 imputed using chip data. Instead, this phenomenon is likely due to a slightly less accurate  
247 imputation than in the GWAS dataset caused by a noisier raw genotype input (Supplementary  
248 Text). This effect is marginal, as evidenced by genome-wide concordance measures (Figure 2)  
249 which are very high at the common end of the MAF spectrum. However, it is important to  
250 note that this slightly less accurate imputation can attenuate some signals as well as boosting  
251 others. For this reason, we would recommend relaxing the discovery significance threshold in

252 1x studies in order to capture those less well imputed, signal-harboring variants, followed  
253 by rigorous replication in larger cohorts and direct validation of genotypes.

254

255 Our study's intent was to focus on the performance on commonly used general-purpose tools  
256 for low-depth sequencing data in isolates, both for genotype calling (GATK) and imputation  
257 (BEAGLE, IMPUTE). There are ongoing efforts to leverage the specificities of both low-depth  
258 sequencing (Davies, et al., 2016)(<https://www.gencove.com>) and of isolated populations  
259 (Livne, et al., 2015). The popularity and long-term support of established generic methods is  
260 an advantage when running complex study designs, as has been shown in other isolate studies  
261 (Herzig, et al., 2018).

262

263 We show that very low depth whole-genome sequencing allows the accurate assessment of  
264 most common and low-frequency variants captured by imputed GWAS designs and achieves  
265 denser coverage of the low-frequency and rare end of the allelic spectrum, albeit at an  
266 increased computational cost. This allows very low depth sequencing studies to recapitulate  
267 signals discovered by imputed chip-based efforts, and to discover significantly associated  
268 variants missed by GWAS imputation (Gilly, et al., 2016). Although cohort-wide high-depth  
269 WGS remains the gold standard for the study of rare and low-frequency variation, very low-  
270 depth WGS designs using population-specific haplotypes for imputation remain a viable  
271 alternative when studying populations poorly represented in existing large reference panels.

272

## 273 **Methods**

### 274 **Cohort details**

275 The HELIC (Hellenic Isolated Cohorts; [www.helic.org](http://www.helic.org)) MANOLIS (Minoan Isolates) collection  
276 focuses on Anogia and surrounding Mylopotamos villages on the Greek island of Crete. All  
277 individuals were required to have at least one parent from the Mylopotamos area to enter  
278 the study. Recruitment was primarily carried out at the village medical centres. The study  
279 includes biological sample collection for DNA extraction and lab-based blood measurements,  
280 and interview-based questionnaire filling. The phenotypes collected include anthropometric  
281 and biometric measurements, clinical evaluation data, biochemical and haematological  
282 profiles, self-reported medical history, demographic, socioeconomic and lifestyle  
283 information. The study was approved by the Harokopio University Bioethics Committee and  
284 informed consent was obtained from every participant.

285

### 286 **Sequencing**

287 Sequencing and mapping for the 990 MANOLIS samples at 1x depth has been described  
288 previously (Gilly, et al., 2016), as well as for 249 MANOLIS samples at 4x (Southam, et al.,  
289 2017), and for 1,457 samples at 22x (Gilly, et al., 2018). For comparison, 5 samples from the  
290 cohort were also whole-exome sequenced at an average depth of 75x. We use a standard  
291 read alignment and variant calling pipeline using samtools(Li, et al., 2009) and  
292 GATK(McKenna, et al., 2010), which is described in detail in the Supplementary Text.

293

### 294 **Variant filtering**

295 Variant quality score recalibration was performed using GATK VQSR v.3.1.1. However, using  
296 the default parameters for the VQSR mixture model yields poor filtering, with a Ti/Tv ratio

297 dropoff at 83% percent sensitivity and a Ti/Tv ratio of 1.8 for high-quality tranches  
298 (Supplementary Figure 3.a). We therefore ran exploratory runs of VQSR across a range of  
299 values for the model parameters, using the dropoff point of the transition/transversion  
300 (Ti/Tv) ratio below 2.0 as an indicator of good fit (Supplementary Figure 4). A small number  
301 of configurations outperformed all others, which allowed us to select an optimal set of  
302 parameters. For the chosen set of parameters, false positive rate is estimated at 10%±5%  
303 (Supplementary Figure 3.b). Indels were excluded from the dataset out of concerns for  
304 genotype quality. We found that the version of VQSR, as well as the annotations used to train  
305 the model, had a strong influence on the quality of the recalibration (Supplementary Figure 4  
306 and Supplementary Text).

307

### 308 **Comparison with downsampled whole genomes**

309 For quality control purposes, reads from 17 of the well-characterised Platinum Genomes  
310 sequenced by Illumina at 50x depth (McCarthy, et al., 2016), and downsampled to 1x depth  
311 using samtools (Christopoulos, 1997) were included in the merged BAM file. VQSR-filtered  
312 calls were then compared to the high-confidence call sets made available by Illumina for those  
313 samples. 524,331 of the 4,348,092 non-monomorphic variant sites were not present in the  
314 high-confidence calls, whereas 1,246,403 of the 5,070,164 non-monomorphic high-  
315 confidence were not recapitulated in the 1x data. This corresponds to an estimated false  
316 positive rate of 12% and false negative rate of 24.6%. Both unique sets had a much higher  
317 proportion of singletons (corresponding to MAF < 2.9%) than the entire sets (57.9% vs 19.9%  
318 of singletons among 1x calls and 51% vs 18.1% among high-confidence calls), which suggests  
319 that a large fraction of the erroneous sites lies in the low-frequency and rare part of the allelic  
320 spectrum. However, genotype accuracy is poor, to the point where it obscures peculiarities



321 in the distribution of allele counts (Supplementary Figure 5). Due to these being present in  
322 the 1000 genomes reference panel, we remove the 17 Platinum Genomes prior to imputation.

323

## 324 **Genotype refinement and imputation**

### 325 *Evaluation of pipelines*

326 The authors of SHAPEIT (Delaneau, et al., 2013) advise to phase whole chromosome when  
327 performing pre-phasing in order to preserve downstream imputation quality. This approach  
328 is computationally intractable for the 1x datasets, where the smallest chromosomes contain  
329 almost 7 times more variants than the largest chromosomes in a GWAS dataset.

330

331 For benchmarking purposes, we designed 13 genotype refinement pipelines involving Beagle  
332 v4.0 (Browning and Browning, 2007) and SHAPEIT2 (Delaneau, et al., 2013) using a 1000  
333 Genomes phase 1 reference panel, which we evaluated against minor allele concordance. All  
334 pipelines were run using the vr-runner scripts  
335 (<https://github.com/VertebrateResequencing/vr-runner>). Pipelines involving Beagle with the  
336 use of a reference panel ranked consistently better (Supplementary Figure 1), with a single  
337 run of reference-based refinement using Beagle outperforming all other runs. IMPUTE2  
338 performed worst on its own, whether with or without reference panel; in fact the addition of  
339 a reference panel did not improve genotype quality massively. Phasing with Beagle without  
340 an imputation panel improved genotype quality, before or after IMPUTE2.

341

342 Halving the number of SNVs per refinement chunk (including 500 flanking positions) from the  
343 4,000 recommended by the vr pipelines resulted in only a modest loss of genotype quality in  
344 the rare part of the allelic spectrum (Supplementary Figure 7), while allowing for a twofold

345 increase in refinement speed. Genotype quality dropped noticeably for rare variants when  
346 imputation was turned on (Supplementary Figure 7), but remained high for low-frequency  
347 and common ones. A reference-free run of Beagle allowed to phase all positions and remove  
348 genotype missingness with no major impact on quality and a low computational cost. We also  
349 tested thunderVCF (Pollin, et al., 2008) for phasing sites, however, the program took more  
350 than 2 days to run on 5,000 SNV chunks and was abandoned.

351

### 352 *Production pipeline for the MANOLIS cohort*

353 For production, we used a reference panel composed of 10,244 haplotypes from the 1000  
354 Genomes Project Phase 1 (n=1,092), UK10K (UK10K Consortium, et al., 2015) TwinsUK  
355 (Moayyeri, et al., 2013) and ALSPAC (Golding, et al., 2001) (n=3,781, 7x WGS), and 249  
356 MANOLIS samples sequenced at 4x depth, which has been described before (Southam, et al.,  
357 2017). Alleles in the reference panel were matched to the reference allele in the called  
358 dataset. Positions where the alleles differed between the called and reference datasets were  
359 removed from both sources. Indels were filtered out due to poor calling quality.

360

361 The pipeline with best minor allele concordance across the board used Beagle v.4 (Browning  
362 and Browning, 2007) to perform a first round of imputation-based genotype refinement on  
363 1,239 HELIC MANOLIS variant callsets, using the aforementioned reference panel. This was  
364 followed by a second round of reference-free imputation, using the same software.

365

366

367

368

### 369 *Variant-level QC*

370 Beagle provides two position level imputation metrics, allelic R-squared (AR2) and dosage R-  
371 squared (DR2). Both measures are highly correlated (Supplementary Figure 8.a). Values  
372 between 0.3 and 0.8 are typically used for filtering (Browning, 2014). In both 1x datasets 59%  
373 and 91% of imputed variants lie below those two thresholds, respectively. The distribution of  
374 scores does not provide an obvious filtering threshold (Supplementary Figure 8.b) due to its  
375 concavity. Since most imputed variants are rare and R-squared measures are highly correlated  
376 with MAF, filtering by AR2 and DR2 would be similar to imposing a MAF threshold  
377 (Supplementary Figure 8.c and d.). Moreover, due to a technical limitation of the vr-runner  
378 pipelines, imputation quality measures were not available for refined positions at the time of  
379 analysis, only imputed ones. Therefore, we did not apply any prior filter in downstream  
380 analyses.

381

### 382 **Sample QC**

383 Due to the sparseness of the 1x datasets, sample-level QC was performed after imputation. 5  
384 samples were excluded from the MANOLIS 1x cohort following PCA-based ethnicity checks.

385

### 386 **Comparison with WES**

387 A set of high confidence genotypes was generated for the 5 exomes in MANOLIS using filters  
388 for variant quality (QUAL>200), call rate (AN=10, 100%) and depth (250x). These filters were  
389 derived from the respective distributions of quality metrics (Supplementary Figure 9).

390 When compared to 5 whole-exome sequences from each cohort, imputed 1x calls  
391 recapitulated 77.2% of non-monomorphic, high-quality exome sequencing calls. Concordance  
392 was high, with only 3.5% of the overlapping positions exhibiting some form of allelic

393 mismatch. When restricting the analysis to singletons, 9105 (58%) of the 15,626 high-quality  
394 singletons in the 10 exomes were captured, with 21% of the captured positions exhibiting  
395 false positive genotypes ( $AC > 1$ ). To assess false positive call rate, we extracted 1x variants  
396 falling within the 71,627 regions targeted by the Agilent design file for WES in overlapping  
397 samples, and compared them to those present in the unfiltered WES dataset. 103,717  
398 variants were called in these regions from WES sequences, compared to 58,666 non-  
399 monomorphic positions in the 1x calls. 1,419 (2.4%) of these positions were unique to the 1x  
400 dataset, indicating a low false-positive rate in exonic regions post-imputation.

401

#### 402 **Genetic relatedness matrix**

403 Relatedness was present at high levels in our cohort, with 99.5% of samples having at least  
404 one close relative (estimated  $\hat{\pi} > 0.1$ ) and an average number of close relatives of 7.8. In  
405 order to correct for this close kinship typical of isolated cohorts, we calculated a genetic  
406 relatedness matrix using GEMMA (Zhou and Stephens, 2012). Given the isolated nature of the  
407 population and the specificities of the sequencing dataset, we used different variant sets to  
408 calculate kinship coefficients. Using the unfiltered 1x variant dataset produced the lowest  
409 coefficients (Figure 10.a), whereas well-behaved set of common SNVs (Arthur, et al., 2017)  
410 produced the highest, with an average difference of  $3.67 \times 10^{-3}$ . Filtering for MAF lowered the  
411 inferred kinship coefficients. Generally, the more a variant set was sparse and enriched in  
412 common variants, the higher the coefficients were. However, these differences only had a  
413 marginal impact on association statistics, as evidenced by a lambda median statistic  
414 difference of 0.02 between the two most extreme estimates of relatedness when used for a  
415 genome-wide association of triglycerides (Supplementary Figure 10.b). For our association  
416 study, we used LD-pruned 1x variants filtered for  $MAF < 1\%$  and Hardy Weinberg equilibrium

417  $p < 1 \times 10^{-5}$  to calculate the relatedness matrix, which translated into 2,848,245 variants for  
418 MANOLIS.

419

## 420 **Single-point association**

### 421 *Pipeline*

422 For association, fifty-seven phenotypes were prepared, with full details of the trait  
423 transformation, filters and exclusions described in Supplementary Table 3. The  
424 ‘transformPhenotype’ (<https://github.com/wtsi-team144/transformPhenotype>) R script was  
425 used to apply a standardised preparation for all phenotypes. Association analysis was  
426 performed on each cohort separately using the linear mixed model implemented in GEMMA  
427 (Zhou and Stephens, 2012) on all variants with minor allele count (MAC) greater than 2  
428 (14,948,665 out of 30,483,158 variants in MANOLIS). We used the aforementioned centered  
429 kinship matrix. GC-corrected p-values from the likelihood ratio test ( $p_{lrt}$ ) are reported.  
430 Singletons and doubletons are removed due to overall low minor allele concordance. Signals  
431 were extracted using the peakplotter software ([https://github.com/wtsi-](https://github.com/wtsi-team144/peakplotter)  
432 [team144/peakplotter](https://github.com/wtsi-team144/peakplotter)) using a window size of 1Mb.

433

## 434 **Data Access**

435 The HELIC genotype and WGS datasets have been deposited to the European Genome-  
436 phenome Archive (<https://www.ebi.ac.uk/ega/home>): EGAD00010000518;  
437 EGAD00010000522; EGAD00010000610; EGAD00001001636, EGAD00001001637. The  
438 peakplotter software is available at <https://github.com/wtsi-team144/peakplotter>, the  
439 transformPhenotype app can be downloaded at [https://github.com/wtsi-](https://github.com/wtsi-team144/transformPhenotype)  
440 [team144/transformPhenotype](https://github.com/wtsi-team144/transformPhenotype).

441

## 442 **Acknowledgements**

443 The authors thank the residents of the Mylopotamos villages for taking part in the study. The  
444 MANOLIS study is dedicated to the memory of Manolis Giannakakis, 1978–2010. This study  
445 makes use of data generated by the UK10K Consortium, derived from samples from the  
446 TwinsUK Cohort and the Avon Longitudinal Study of Parents and Children (ALSPAC). A full list  
447 of the investigators who contributed to the generation of the data is available from  
448 [www.UK10K.org](http://www.UK10K.org), last accessed April 29, 2016. The GATK program was made available through  
449 the generosity of Medical and Population Genetics program at the Broad Institute, Inc. This  
450 research has been conducted using the UK Biobank Resource using Application Number  
451 13745. This work was funded by the Wellcome Trust [098051] and the European Research  
452 Council [ERC-2011-StG 280559-SEPI]. Funding for UK10K was provided by the Wellcome Trust  
453 under award WT091310. The authors thank Sophie Hackinger and Bram Prins for  
454 proofreading the article. The authors also thank Heather Elding, William Astle, Tao Jiang Adam  
455 Butterworth and Nicole Soranzo for their contributions to a previous version of the  
456 manuscript.

457

458

## 459 **Disclosure Declaration**

460 The authors declare that they have no competing interests.

461

462

## 463 **References**

464

465 1000 Genomes Project Consortium, *et al.* A global reference for human genetic variation.  
466 *Nature* 2015;526(7571):68-74.

467 Alex Buerkle, C. and Gompert, Z. Population genomics based on low coverage sequencing:  
468 how low should we go? *Mol Ecol* 2013;22(11):3028-3035.

469 Arthur, R., *et al.* AKT: ancestry and kinship toolkit. *Bioinformatics* 2017;33(1):142-144.

470 Astle, W.J., *et al.* The Allelic Landscape of Human Blood Cell Trait Variation and Links to  
471 Common Complex Disease. *Cell* 2016;167(5):1415-1429 e1419.

472 Brody, J.A., *et al.* Analysis commons, a team approach to discovery in a big-data environment  
473 for genetic epidemiology. *Nat Genet* 2017;49(11):1560-1563.

474 Browning, B.L. Private communication. 2014.

475 Browning, B.L. and Browning, S.R. Genotype Imputation with Millions of Reference Samples.  
476 *Am J Hum Genet* 2016;98(1):116-126.

477 Browning, S.R. and Browning, B.L. Rapid and accurate haplotype phasing and missing-data  
478 inference for whole-genome association studies by use of localized haplotype clustering. *Am*  
479 *J Hum Genet* 2007;81(5):1084-1097.

480 Bycroft, C., *et al.* Genome-wide genetic data on ~500,000 UK Biobank participants. *bioRxiv*  
481 2017.

482 Christopoulos, K.T.D. Minorities in Greece. Kritiki; 1997.

483 Converge Consortium. Sparse whole-genome sequencing identifies two loci for major  
484 depressive disorder. *Nature* 2015;523(7562):588-591.

485 Davies, R.W., *et al.* Rapid genotype imputation from sequence without reference panels. *Nat*  
486 *Genet* 2016;48(8):965-969.

487 Delaneau, O., *et al.* Haplotype estimation using sequencing reads. *Am J Hum Genet*  
488 2013;93(4):687-696.

489 Gilly, A., *et al.* Very low-depth sequencing in a founder population identifies a  
490 cardioprotective APOC3 signal missed by genome-wide imputation. *Hum Mol Genet*  
491 2016;25(11):2360-2365.

492 Gilly, A., *et al.* Cohort-wide deep whole genome sequencing and the allelic architecture of  
493 complex traits. *bioRxiv* 2018.

494 Golding, J., *et al.* ALSPAC--the Avon Longitudinal Study of Parents and Children. I. Study  
495 methodology. *Paediatr Perinat Epidemiol* 2001;15(1):74-87.

- 496 Herzig, A.F., *et al.* Strategies for phasing and imputation in a population isolate. *Genet*  
497 *Epidemiol* 2018;42(2):201-213.
- 498 Le, S.Q. and Durbin, R. SNP detection and genotyping from low-coverage sequencing data on  
499 multiple diploid samples. *Genome Res* 2011;21(6):952-960.
- 500 Li, H., *et al.* The Sequence Alignment/Map format and SAMtools. *Bioinformatics*  
501 2009;25(16):2078-2079.
- 502 Livne, O.E., *et al.* PRIMAL: Fast and accurate pedigree-based imputation from sequence data  
503 in a founder population. *PLoS Comput Biol* 2015;11(3):e1004139.
- 504 McCarthy, S., *et al.* A reference panel of 64,976 haplotypes for genotype imputation. *Nat*  
505 *Genet* 2016;48(10):1279-1283.
- 506 McKenna, A., *et al.* The Genome Analysis Toolkit: a MapReduce framework for analyzing next-  
507 generation DNA sequencing data. *Genome Res* 2010;20(9):1297-1303.
- 508 Moayyeri, A., *et al.* The UK Adult Twin Registry (TwinsUK Resource). *Twin Res Hum Genet*  
509 2013;16(1):144-149.
- 510 Pasaniuc, B., *et al.* Extremely low-coverage sequencing and imputation increases power for  
511 genome-wide association studies. *Nat Genet* 2012;44(6):631-635.
- 512 Pollin, T.I., *et al.* A null mutation in human APOC3 confers a favorable plasma lipid profile and  
513 apparent cardioprotection. *Science* 2008;322(5908):1702-1705.
- 514 Southam, L., *et al.* Whole genome sequencing and imputation in isolated populations identify  
515 genetic associations with medically-relevant complex traits. *Nat Comms* 2017(in press).
- 516 Southam, L., *et al.* Whole genome sequencing and imputation in two Greek isolated  
517 populations identifies associations with complex traits of medical importance. *Nat Comms*  
518 2017;in review.
- 519 Tachmazidou, I., *et al.* Whole-Genome Sequencing Coupled to Imputation Discovers Genetic  
520 Signals for Anthropometric Traits. *Am J Hum Genet* 2017;100(6):865-884.
- 521 UK10K Consortium, *et al.* The UK10K project identifies rare variants in health and disease.  
522 *Nature* 2015;526(7571):82-90.
- 523 Zhou, X. and Stephens, M. Genome-wide efficient mixed-model analysis for association  
524 studies. *Nat Genet* 2012;44(7):821-824.
- 525
